# Supplementary material for: Trust in Medicine as a Factor Conditioning Behaviors Recommended by Healthcare Experts during the COVID-19 Pandemic in Poland
Source: MDPI journal article supplement (doi:10.3390/ijerph19010605), 2022-01-05
Supplement: s1 [file s1]

**Appendix 2.** Final cluster centers resulting from a cluster analysis using the k-means method  
(on a scale from 1 to 5)

|                                                                                                                                                           | Focus                                 |                                            |
|-----------------------------------------------------------------------------------------------------------------------------------------------------------|---------------------------------------|--------------------------------------------|
|                                                                                                                                                           | 1                                     | 2                                          |
|                                                                                                                                                           | <b>Moderate liberal<br/>(N = 471)</b> | <b>Moderate conservative<br/>(N = 601)</b> |
|                                                                                                                                                           | Centers of focus                      |                                            |
| People who take part in the demonstrations are exposing society to an increase in coronavirus infections.                                                 | 2                                     | 4                                          |
| I think that demonstrations are necessary in order to make the government aware that many people do not agree with the Constitutional Tribunal's judgment | 5                                     | 3                                          |
| The Constitutional Tribunal's judgment was right                                                                                                          | 1                                     | 3                                          |
| Polish abortion laws should be liberalized. Abortion should be available on demand.                                                                       | 4                                     | 3                                          |
| It was not good timing for the Constitutional Tribunal to issue its judgment during the pandemic.                                                         | 5                                     | 4                                          |
| Poland's abortion laws should be maintained in their current state. The so-called abortion compromise should not be changed.                              | 3                                     | 3                                          |
| Protesters should not use profanities.                                                                                                                    | 3                                     | 4                                          |
| Protesters should not destroy church property.                                                                                                            | 4                                     | 4                                          |
| Protesters should not offend priests and bishops.                                                                                                         | 2                                     | 4                                          |
